# Supplementary material for: The Clinical Relevance of RAS Pathway Gene Mutations in Pediatric B-Cell Acute Lymphoblastic Leukemia
Source: Research Square preprint supplement (doi:10.21203/rs.3.rs-8082043/v1), 2025-12-08
Supplement: Supplementary file 1 [file 3bed8ca3dc13f13ea27dcef7.xlsx]

## Sheet: S1
	Table S1:Clinical characteristics of all enrolled patients
		N	all patients(n=562)
	Follow-up year median, years (range)	562	2.67 (1.53-3.80)
	Age median at diagnosis, years (range)	562	4.8 (3.2-7.9)
	Prognosis	562
	3-year OS (%)		0.9789
	3-year EFS (%)		0.8986
	Age <10 years, n (%)	562	467 (83.09%)
	Male gender, n (%)	562	339 (60.14%)
	WBC≥100×10⁹/L , n (%)	562	48 (8.54%)
	Hb<100g/L, n (%)	562	439 (78.11%)
	PLT≤100×10⁹/L , n (%)	562	360 (64.06%)
	PLT≤20×10⁹/L , n (%)	562	84 (14.95%）
	Risk classification, n (%)	534
	Low risk		312 (58.43%)
	Intermediate risk		221 (41.39%)
	High risk		1 (0.18%)
	Day 19 MRD ≥ 0.1%, n (%)	546	171 (31.32%)
	Day 46 MRD ≥ 0.1%, n (%)	523	10 (1.91%)
	Day 19 MRD ≥ 0.01%, n (%)	546	244 (44.69%)
	Day 46 MRD ≥ 0.01%, n (%)	523	33 (6.31%)
	RAS pathway mutations, n (%)	562	224 (38.86%)
	NRAS mutations, n (%)		120 (21.35%)
	KRAS mutations, n (%)		109 (19.40%)
	NF1 mutations, n (%)		57 (10.14%)
	PTPN11 mutations, n (%)		11 (1.96%)
	FLT3 mutations, n (%)	562	82 (14.59%)
	Subtype	562
	FLT3/NF1 co-mutated		6 (1.07%)
	DUX4		43 (7.65%)
	KMT2Ar		16 (2.85%)
	BCR::ABL1		9 (1.6%)
	ETV6::RUNX1		101 (17.97%)
	Ph-like		10 (1.78%)
	ZNF384		11 (1.96%)
	hyperdiploidy		130 (23.13%)
	TCF::PBX1		26 (4.63%)
	PAX5		14 (2.49%)
	MEF2D		5 (0.89%)
	B- other		191 (33.99%)
	OS: overall survival; EFS: event-free survival; WBC: white blood cell; Hb: hemoglobin; PLT: platelet;MRD: minimal residual disease;

## Sheet: S2
	Table S2: Correlative analysis of genetic co-mutations between FLT3 and RAS pathway genes
	Co-mutations between		N(%)	Co-mutation of FLT3, n (%)	Chi-Square Test			Phi-Coefficient
					X-squared	p-value	residuals
	FLT3	NF1	11 (1.9%)	6 (54.5%)	11.518	0.0006892	3.5	0.16
		NRAS	120 (21.1%)	19 (15.8)	0.12463	0.7241	0.41	0.021
		KRAS	109 (19.2%)	20 (18.3%)	1.3228	0.2501	1.08	0.055
		PTPN11	57 (10.0%)	12 (21.1%)	1.7064	0.1915	1.32	0.063

## Sheet: S3
	Table S3: Comparison of Clinical Characteristics between Patients with FLT3 or RAS Pathway Gene Mutations and Those with the Wild-type
			RAS pathway mutations				FLT3 mutations				NRAS mutations				KRAS pathway mutations
		all enrolled patinets (N=562)	RAS genes mutated (n=224)	RAS genes wild type (n=338)	p-value		FLT3 mutated (n=82)	FLT3 wild-type (n=480)	p-value		NRAS mutated (n=120)	NRAS wild-type (n=442)	p-value		KRAS mutated (n=109)	KRAS wild-type (n=453)	p-value
	Age <10 years	467 (83.09%)	182	285	0.4		69 ( 84.15% )	398 ( 82.92% )	0.91		93 ( 77.50% )	374 ( 84.62% )	0.09		94 ( 86.24% )	373 ( 82.34% )	0.41
	Male gender	339 (60.14%)	139	199	0.51		52 ( 63.41% )	286 ( 59.58% )	0.59		70 ( 58.33% )	268 ( 60.63% )	0.73		68 ( 62.39% )	270 ( 59.60% )	0.67
	WBC≥100×10⁹/L	48 (8.54%)	14	34	0.15		5 ( 6.10% )	43 ( 8.96% )	0.52		6 ( 5.00% )	42 ( 9.50% )	0.17		10 ( 9.17% )	38 ( 8.39% )	0.94
	Hb<100g/L	439 (78.11%)	176	263	0.91		64 ( 78.05% )	375 ( 78.13% )	1		89 ( 74.17% )	350 ( 79.19% )	0.29		90 ( 82.57% )	350 ( 77.26% )	0.39
	BPC≤100×10⁹/L	360 (64.06%)	146	214	0.72		55 ( 67.07% )	305 ( 63.54% )	0.62		69 ( 57.50% )	291 ( 65.84% )	0.11		82 ( 75.23% )	278 ( 61.37% )	0.009
	BPC≤20×10⁹/L	84 (14.95%）	44	180	0.02		14 ( 17.07% )	70 ( 14.58% )	0.68		20 ( 16.67% )	64 ( 14.48% )	0.2		25 ( 22.94% )	59 ( 13.02% )	0.01
	Day 19 MRD≥0.1%	171 (31.32%)	80	91	0.05		30 ( 36.59% )	141 ( 29.38% )	0.21		40 ( 33.33% )	131 ( 29.64% )	0.62		35 ( 32.11% )	136 ( 30.02% )	0.82
	Day 46 MRD≥0.1%	10 (1.91%)	5	5	0.53		2 ( 2.44% )	8 ( 1.67% )	0.64		2 ( 1.67% )	8 ( 1.81% )	1		1 ( 0.92% )	9 ( 1.99% )	0.7
	Day 19 MRD≥0.01%	244 (44.69%)	110	134	0.06		42 ( 51.22% )	202 ( 42.08% )	0.13		58 ( 48.33% )	186 ( 42.08% )	0.35		50 ( 45.87% )	194 ( 42.83% )	0.72
	Day 46 MRD≥0.01%	33 (6.31%)	13	20	1		2 ( 2.44% )	31 ( 6.46% )	0.21		5 ( 4.17% )	28 ( 6.33% )	0.51		6 ( 5.50% )	27 ( 5.96% )	1
	Molecular subtype
	DUX4	43 (7.65%)	24	19	0.04		6 ( 7.32% )	37 ( 7.71% )	1		20 ( 16.67% )	23 ( 5.20% )	<0.0001		5 ( 4.59% )	38 ( 8.39% )	0.23
	KMT2Ar	16 (2.85%)	3	13	0.12		2 ( 2.44% )	14 ( 2.92% )	1		2 ( 1.67% )	14 ( 3.17% )	0.54		14 ( 12.84% )	2 ( 0.44% )	0.75
	BCR::ABL1	9 (1.6%)	0	9	0.01		0 ( 0.00% )	9 ( 1.88% )	0.37		0 ( 0.00% )	9 ( 2.04% )	0.22		0 ( 0.00% )	9 ( 1.99% )	0.22
	ETV6::RUNX1	101 (17.97%)	20	81	<0.0001		1 ( 1.22% )	100 ( 20.83% )	<0.0001		5 ( 4.17% )	96 ( 21.72% )	<0.0001		86 ( 78.90% )	15 ( 3.31% )	0.26
	Ph-like	10 (1.78%)	1	9	0.06		8 ( 9.76% )	2 ( 0.42% )	0.65		0 ( 0.00% )	10 ( 2.26% )	0.13		1 ( 0.92% )	9 ( 1.99% )	0.7
	ZNF384	11 (1.96%)	5	6	0.76		1 ( 1.22% )	10 ( 2.08% )	1		1 ( 0.83% )	10 ( 2.26% )	0.47		7 ( 6.42% )	4 ( 0.88% )	0.24
	hyperdiploidy	130 (23.13%)	85	45	<0.0001		42 ( 51.22% )	87 ( 18.13% )	<0.0001		42 ( 35.00% )	87 ( 19.68% )	<0.0001		79 ( 72.48% )	50 ( 11.04% )	<0.001
	PAX5	26 (4.63%)	8	6	0.29		3 ( 3.66% )	11 ( 2.29% )	0.44		4 ( 3.33% )	10 ( 2.26% )	0.51		4 ( 3.67% )	10 ( 2.21% )	0.49
	MEF2D	14 (2.49%)	1	4	0.65		1 ( 1.22% )	4 ( 0.83% )	0.55		1 ( 0.83% )	4 ( 0.90% )	1		1 ( 0.92% )	4 ( 0.88% )	1
	TCF::PBX1	5 (0.89%)	2	24	0.0003		0 ( 0.00% )	26 ( 5.42% )	0.02		2 ( 1.67% )	24 ( 5.43% )	0.09		0 ( 0.00% )	26 ( 5.74% )	0.004
	B-other	191 (33.99%)	69	122	0.23		17 ( 20.73% )	174 ( 36.25% )	0.009		42 ( 35.00% )	149 ( 33.71% )	0.88		26 ( 23.85% )	165 ( 36.42% )	0.02
	OS: overall survival; EFS: event-free survival; WBC: white blood cell; Hb: hemoglobin; PLT: platelet;MRD: minimal residual disease;
	Continued
			PTPN11 mutations				NF1 mutations				NRAS/KRAS co-mutations				FLT3/NF1 co-mutations
		all enrolled patinets (N=562)	PTPN11 mutated (n=57)	PTPN11 wild-type (n=505)	p-value		NF1 mutated (n=11)	NF1 wild-type (n=551)	p-value		NRAS/KRAS co-mutated (n=39)	wild-type (n=523)	p-value		FLT3/NF1 co-mutated (n=6)	wild-type (n=556)	p-value
	Age <10 years	467 (83.09%)	45 ( 78.95% )	422 ( 83.56% )	0.49		8 ( 72.73%)	459 ( 83.30%)	0.41		30 ( 76.92% )	437 ( 83.56% )	0.4		4 (66.67%)	463 (83.27%)	0.27
	Male gender	339 (60.14%)	36 ( 63.16% )	302 ( 59.80% )	0.73		9 ( 81.82%)	329 ( 59.71%)	0.21		23 ( 58.97% )	315 ( 60.23% )	1		5 (83.33%)	333 (59.89%)	0.41
	WBC≥100×10⁹/L	48 (8.54%)	3 ( 5.26% )	45 ( 8.91% )	0.46		1 ( 9.09%)	47 ( 8.53%)	1		7 ( 17.95% )	102 ( 19.50% )	0.98		0 (0%)	48 (8.63%)	1
	Hb<100g/L	439 (78.11%)	45 ( 78.95% )	394 ( 78.02% )	1		6 ( 54.55%)	433 ( 78.58%)	0.07		29 ( 74.36% )	410 ( 78.39% )	0.7		3 (50.0%)	436 (78.42%)	0.12
	BPC≤100×10⁹/L	360 (64.06%)	35 ( 61.40% )	325 ( 64.36% )	0.77		8 ( 72.73%)	352 ( 63.88%)	0.75		32 ( 82.05% )	446 ( 85.28% )	0.75		4 (66.67%)	356 (64.03%)	1
	BPC≤20×10⁹/L	84 (14.95%）	9 ( 15.79% )	75 ( 14.85% )	1		9 ( 81.82%)	469 ( 85.12%)	0.67		26 ( 66.67% )	334 ( 63.86% )	0.86		0 (0%)	84 (15.11%)	0.6
	Day 19 MRD≥0.1%	171 (31.32%)	30 ( 52.63% )	141 ( 27.92% )	<0.001		6 ( 54.55%)	238 ( 43.19%)	0.55		14 ( 35.90% )	157 ( 30.02% )	0.65		4 (66.67%)	167 (30.04%)	0.08
	Day 46 MRD≥0.1%	10 (1.91%)	0 ( 0.00% )	10 ( 1.98% )	0.61		2 ( 18.18%)	31 ( 5.63%)	0.15		0 ( 0.00% )	10 ( 1.91% )	1		2 (33.33%)	8 (1.44%)	0.005
	Day 19 MRD≥0.01%	244 (44.69%)	34 ( 59.65% )	210 ( 41.58% )	0.0162		6 ( 54.55%)	238 ( 43.19%)	0.55		19 ( 48.72% )	225 ( 43.02% )	0.72		5 (83.33%)	239 (42.99%)	0.09
	Day 46 MRD≥0.01%	33 (6.31%)	3 ( 5.26% )	30 ( 5.94% )	1		2 ( 18.18%)	31 ( 5.63%)	0.15		1 ( 2.56% )	32 ( 6.12% )	0.72		2 (33.33%)	31 (5.58%)	0.0494
	Molecular subtype
	DUX4	43 (7.65%)	5 ( 8.77% )	38 ( 7.52% )	0.79		0 ( 0.00% )	43 ( 7.80% )	1		3 ( 7.69% )	40 ( 7.65% )	1		NA
	KMT2Ar	16 (2.85%)	0 ( 0.00% )	19 ( 3.76% )	0.39		0 ( 0.00% )	16 ( 2.90% )	1		1 ( 2.56% )	15 ( 2.87% )	1
	BCR::ABL1	9 (1.6%)	0 ( 0.00% )	9 ( 1.78% )	0.61		0 ( 0.00% )	9 ( 1.63% )	1		0 ( 0.00% )	9 ( 1.72% )	1
	ETV6::RUNX1	101 (17.97%)	1 ( 1.75% )	100 ( 19.80% )	<0.001		2 ( 18.18% )	99 ( 17.97% )	1		2 ( 5.13% )	99 ( 18.93% )	0.03
	Ph-like	10 (1.78%)	1 ( 1.75% )	9 ( 1.78% )	1		0 ( 0.00% )	10 ( 1.81% )	1		0 ( 0.00% )	10 ( 1.91% )	1
	ZNF384	11 (1.96%)	1 ( 1.75% )	10 ( 1.98% )	1		0 ( 0.00% )	11 ( 2.00% )	1		0 ( 0.00% )	11 ( 2.10% )	1
	hyperdiploidy	130 (23.13%)	30 ( 52.63% )	99 ( 19.60% )	<0.001		0 ( 0.00% )	129 ( 23.41% )	0.08		20 ( 51.28% )	110 ( 21.03% )	<0.001
	PAX5	26 (4.63%)	0 ( 0.00% )	14 ( 2.77% )	0.38		0 ( 0.00% )	14 ( 2.54% )	1		0 ( 0.00% )	14 ( 2.68% )	0.61
	MEF2D	14 (2.49%)	0 ( 0.00% )	5 ( 0.99% )	1		0 ( 0.00% )	5 ( 0.91% )	1		1 ( 2.56% )	4 ( 0.76% )	0.3
	TCF::PBX1	5 (0.89%)	0 ( 0.00% )	26 ( 5.15% )	0.1		0 ( 0.00% )	26 ( 4.72% )	1		0 ( 0.00% )	26 ( 4.97% )	0.24
	B-other	191 (33.99%)	18 ( 31.58% )	173 ( 34.26% )	0.8		3 ( 27.27% )	188 ( 34.12% )	0.76		12 ( 30.77% )	179 ( 34.23% )	0.79
	OS: overall survival; EFS: event-free survival; WBC: white blood cell; Hb: hemoglobin; PLT: platelet;MRD: minimal residual disease;

## Sheet: S4
	Table S4: Overall survival and event-free survival analysis based on clinical or molecular features: Log-rank test results
	Variable	p-value (OS)	p-value (EFS)
	Age <10 years vs. ≥10 years	0.052	0.081
	Male sex vs. Female sex	0.14	0.0014
	WBC≥100×10⁹/L vs. <100×10⁹/L	0.0072	<0.0001
	Hb<100g/L vs. ≥ 100g/L	0.75	0.75
	PLT≤20×10⁹/L vs. >20×10⁹/L	0.21	0.77
	Day 19 MRD ≥ 1% vs. <1%	0.066	0.00019
	Day 19 MRD ≥ 0.1% vs. <0.1%	0.054	0.005
	Day 19 MRD ≥ 0.01% vs. <0.01%	0.057	0.0079
	Day 46 MRD ≥ 0.1% vs. <0.1%	<0.0001	0.00084
	Day 46 MRD ≥ 0.01% vs. <0.01%	0.04	0.012
	RAS pathway mutations vs. wild-type	0.82	0.36
	NRAS mutations vs. wild-type	0.28	0.61
	KRAS mutations vs. wild-type	0.42	0.23
	NF1 mutations vs. wild-type	0.055	0.2
	PTPN11 mutations vs. wild-type	0.88	0.85
	FLT3 mutations vs. wild-type	0.24	0.38
	FLT3/NF1 co-mutations vs. wild-type	0.003	0.0061
	Subtype
	DUX4 vs. wild-type	0.39	0.53
	KMT2Ar vs. wild-type	0.17	<0.0001
	BCR::ABL1 vs. wild-type	0.013	0.47
	ETV6::RUNX1 vs. wild-type	0.42	0.016
	Ph-like vs. wild-type	0.0094	0.31
	ZNF384 vs. wild-type	0.66	0.88
	hyperdiploidy vs. wild-type	0.075	0.12
	TCF::PBX1 vs. wild-type	0.51	0.97
	PAX5 vs. wild-type	0.62	0.36
	MEF2D vs. wild-type	0.0011	0.18
	B- other vs. wild-type	0.65	0.41
	OS: overall survival; EFS: event-free survival; WBC: white blood cell; Hb: hemoglobin; PLT: platelet;MRD: minimal residual disease;

## Sheet: S5
	Table S4: Log-rank test analysis of co-mutations between FLT3 and RAS pathway gene (NRAS/KRAS/PTPN11/NF1)
	Variables	N (%)	Overall Survival	Event-free Survival
			Log-rank test p-value	Log-rank test p-value
	Co-mutations of FLT3 and NRAS vs. wild-type	19 ( 3.38% )	0.53	0.28
	Co-mutations of FLT3 and KRAS vs. wild-type	20 ( 3.56% )	0.31	0.042*
	Co-mutations of FLT3 and PTPN11 vs. wild-type	12 ( 2.14% )	0.1	0.25
	Co-mutations of FLT3 and NF1 vs. wild-type	6 ( 1.07% )	0.003**	0.0061**
	Co-mutations of NRAS and KRAS vs. wild-type	39 ( 6.94% )	0.35	0.032*
	Co-mutations of NRAS and PTPN11 vs. wild-type	21 ( 3.74% )	0.49	0.62
	Co-mutations of NRAS and NF1 vs. wild-type	1 ( 0.18% )	0.92	0.86
	Co-mutations of KRAS and PTPN11 vs. wild-type	17 ( 3.02% )	0.2	0.094
	Co-mutations of KRAS and NF1 vs. wild-type	2 ( 0.36% )	0.86	0.68
	Co-mutations of PTPN11 and NF1 vs. wild-type	1 ( 0.18% )	0.88	0.79
	p<0.05*, p<0.01**

## Sheet: S6
	Table S5: Univariate analysis for OS and EFS
	Variables	OS				EFS
		HR	95%Cl	p-value		HR	95%Cl	p-value
	Age <10 years vs. ≥10 years	0.3151	0.092-1.079	0.0659		0.5537	0.2823-1.086	0.0855
	WBC≥100×10⁹/L vs. <100×10⁹/L	5.151	1.359-19.52	0.0159*		4.565	2.268-9.189	<0.001***
	Hb<100g/L vs. ≥100g/L	0.8056	0.2131-3.053	0.752		1.12	0.5581-2.249	0.749
	BPC≤100×10⁹/L vs. >100×10⁹/L	1.546	0.4102-5.829	0.52		1.923	0.9809-3.77	0.0569
	Male gender vs. female gender	2.965	0.6407-13.73	0.164		3.076	1.49-6.351	0.00238 **
	Day 19 MRD≥0.01% vs. <0.01%	4.186	0.8441-20.76	0.0797		2.241	1.215-4.132	0.00974 **
	Day 46 MRD≥0.01% vs. <0.01%	4.773	0.9209-24.73	0.0626		2.707	1.201-6.098	0.0163 *
	Molecular subtype
	FLT3/NF1 co-mutated vs. wild-type	11.74	1.482-93.05	0.0197*		5.804	1.397-24.11	0.0155*
	DUX4 vs. wild-type	3.685e-08	0-Inf	0.998		0.637	0.1546-2.625	0.533
	KMT2Ar vs. wild-type	3.793	0.48-29.97	0.206		6.624	2.812-15.6	<0.001***
	BCR::ABL1 vs. wild-type	8.71	1.1-68.97	0.0403 *		2.045	0.2815-14.85	0.48
	ETV6::RUNX1 vs. wild-type	0.4403	0.05618-3.45	0.435		0.2632	0.08178-0.8471	0.0252 *
	Ph-like vs. wild-type	9.571	1.183-77.44	0.0342 *		2.705	0.3691-19.83	0.327
	ZNF384 vs. wild-type	1.091e-07	0-Inf	0.998		1.171	0.1614-8.491	0.876
	hyperdiploidy vs. wild-type	9.731e-09	0-Inf	0.997		0.5365	0.2406-1.196	0.128
	PAX5 vs. wild-type	1.083e-07	0-Inf	0.998		1.925	0.4667-7.943	0.365
	MEF2D vs. wild-type	13.71	1.735-108.4	0.013*		3.581	0.4931-26	0.207
	TCF::PBX1 vs. wild-type	3.867e-08	0-Inf	0.998		1.028	0.2495-4.237	0.969
	B-other vs, wild-type	1.33	0.3833-4.614	0.653		1.274	0.7165-2.264	0.41
	OS: overall survival; EFS: event-free survival; HR: Hazard Ratio; 95% Cl: 95% Confidence Interval; WBC: white blood cell; Hb: hemoglobin; PLT: platelet;MRD: minimal residual disease; *p<0.05; ** p<0.01; ***p<0.001;
